# Supplementary material for: Enhanced cooperative binding of oligonucleotides to form DNA duplexes mediated by metal ion chelationElectronic supplementary information (ESI) available: experimental details. See http://www.rsc.org/suppdata/cc/b2/b206054j/
Source: Royal Society of Chemistry journal article supplement (doi:10.1039/b206054j), 2002-08-05
Supplement: b206054j.doc [file b206054j.doc]

Supplementary Material (ESI) for Chemical Communications

This journal is © The Royal Society of Chemistry 2002

**Enhanced Cooperative Binding of Oligonucleotides to Form DNA Duplexes Mediated by Metal Ion Chelation.**

Imogen Horsey, Yamuna Krishnan-Ghosh and Shankar Balasubramanian.*

*University Chemical Laboratories, University of Cambridge, Lensfield Road, Cambridge, CB2 1EW, UK*

*Synthesis of Diethyl Nitrilotriacetic Acid Acetate (****1****)*

The synthetic route to IDA conjugated 9 mers was based on a protocol by Endo and Komiyama.17 To glycine (2 g, 26.6 mmoles) in CAPS buffer (160 mL; 0.1 M; pH 10.2) was added a solution of ethyl bromoacetate (5.84 mL, 2 equiv) and triethylamine (7.32 mL; 2 equiv) in dry DMF (40 mL) and allowed to stir overnight at room temperature followed by extraction with diethyl ether (6  40 mL). Washes 2-6 were combined, solvent evaporated in vacuo to give **1** which was a light brown oil (217 mg, 3.3%). 1H-NMR (250 MHz, CDCl3): 1.28 (t, 6H), 3.51 (s, 2H), 3.58 (s, 4H), 4.22 (q, 4H). 13C-NMR (250 MHz, CDCl3)  negative ion electrospray mass spectrometryS-MS): (M-H)-: 246.0 (Calc. 246.1).

*Activation and Coupling of* ***1*** *to Amino modified Oligonucleotides.*

To 1 (4.6 L, 20 moles) in acetonitrile (195.4 L) was added diisopropylethylamine (4.8 L, 1.4 equiv) and a solution of dicyclohexylcarbodiimide (3.52 mg, 1.62 equiv) in dry DMF (400 L) followed by stirring for 10 min. *N*-Hydroxysuccinimide (3.52 mg, 1.6 equiv) in dry DMF (400 L) was added and allowed to stir overnight affording **2**, the activated ester of **1**. A portion of this mixture was added to a solution of amino-modified 9 mer (100 nmoles) in borate buffer (312.5 L, 0.2 M, pH 9.0) and allowed to react for 45 min at room temperature. A second lot of activated ester solution (125 L) was added and the reaction was stirred for 3.5 h. The sample was divided into 2 equal portions, made upto 1 mL with water and purified through a NAP 10 column. Oligonucleotides were purified further by HPLC using a TosoHaas TSKgel Oligo RP 5 M column (4.6  150 mM) with a mobile phase A of 0.1 M Ammonium acetate (pH 7.0) and mobile phase B of acetonitrile and a flow rate of 1mL/min. (75% yield by A260). **2** ES-MS: MH+ 345.2 (calc: 345.1). **Et2AIDA** : -ES-MS: (M-H)- : 3171 (calc. 3174). **Et2BIDA** : -ES-MS: (M-H)- : 3142 (calc. 3143).

*Synthesis of* ***AIDA*** *and* ***BIDA***

To either **Et2AIDA** or **Et2BIDA** (10 nmoles) in water (342 L) was added NaOH solution (158 L, 100 mM) and the mixture was allowed to stir for 1.75 h followed by neutralization with HCl (0.1 M). The reaction mixture was made upto 1 mL with water and purified through a NAP 10 column (yield 99% by A260). **AIDA** was 32P-radiolabelled and analysed by PAGE where it was found that **AIDA** ran as a single band with a different mobility to **Et2AIDA** confirming that the desired transformation had occurred. –ESMS: MW **AIDA**: 3121 (calcd.: 3118); **BIDA**: 3091.( calcd.: 3087) All other oligonucleotides were obtained from Oswel DNA Services (Southampton).

*Analysis of UV-melting data to obtain Thermodynamic Parameters at 298 K.*

The thermodynamic parameters have been calculated for only those curves that yielded a single transition assuming that the transition proceeds in an ‘all-or-none’ two state manner. The fraction of the strands in the duplex state () and the binding constant K for duplex formation were evaluated from the melting curve by Breslauer’s method for non-self-complementary strands that associate with a molecularity of 3.13 K was thus given by the equation K = /{(C/3)2(1-)2}.
